# Supplementary material for: Comprehensive Genome and Plasmidome Analysis of Antimicrobial Resistant Bacteria in Wastewater Treatment Plant Effluent of Tokyo
Source: MDPI journal article supplement (doi:10.3390/antibiotics11101283), 2022-09-21

**Fig. S1**

**Flowchart for verification of strain clonality using comparative genomic analysis**

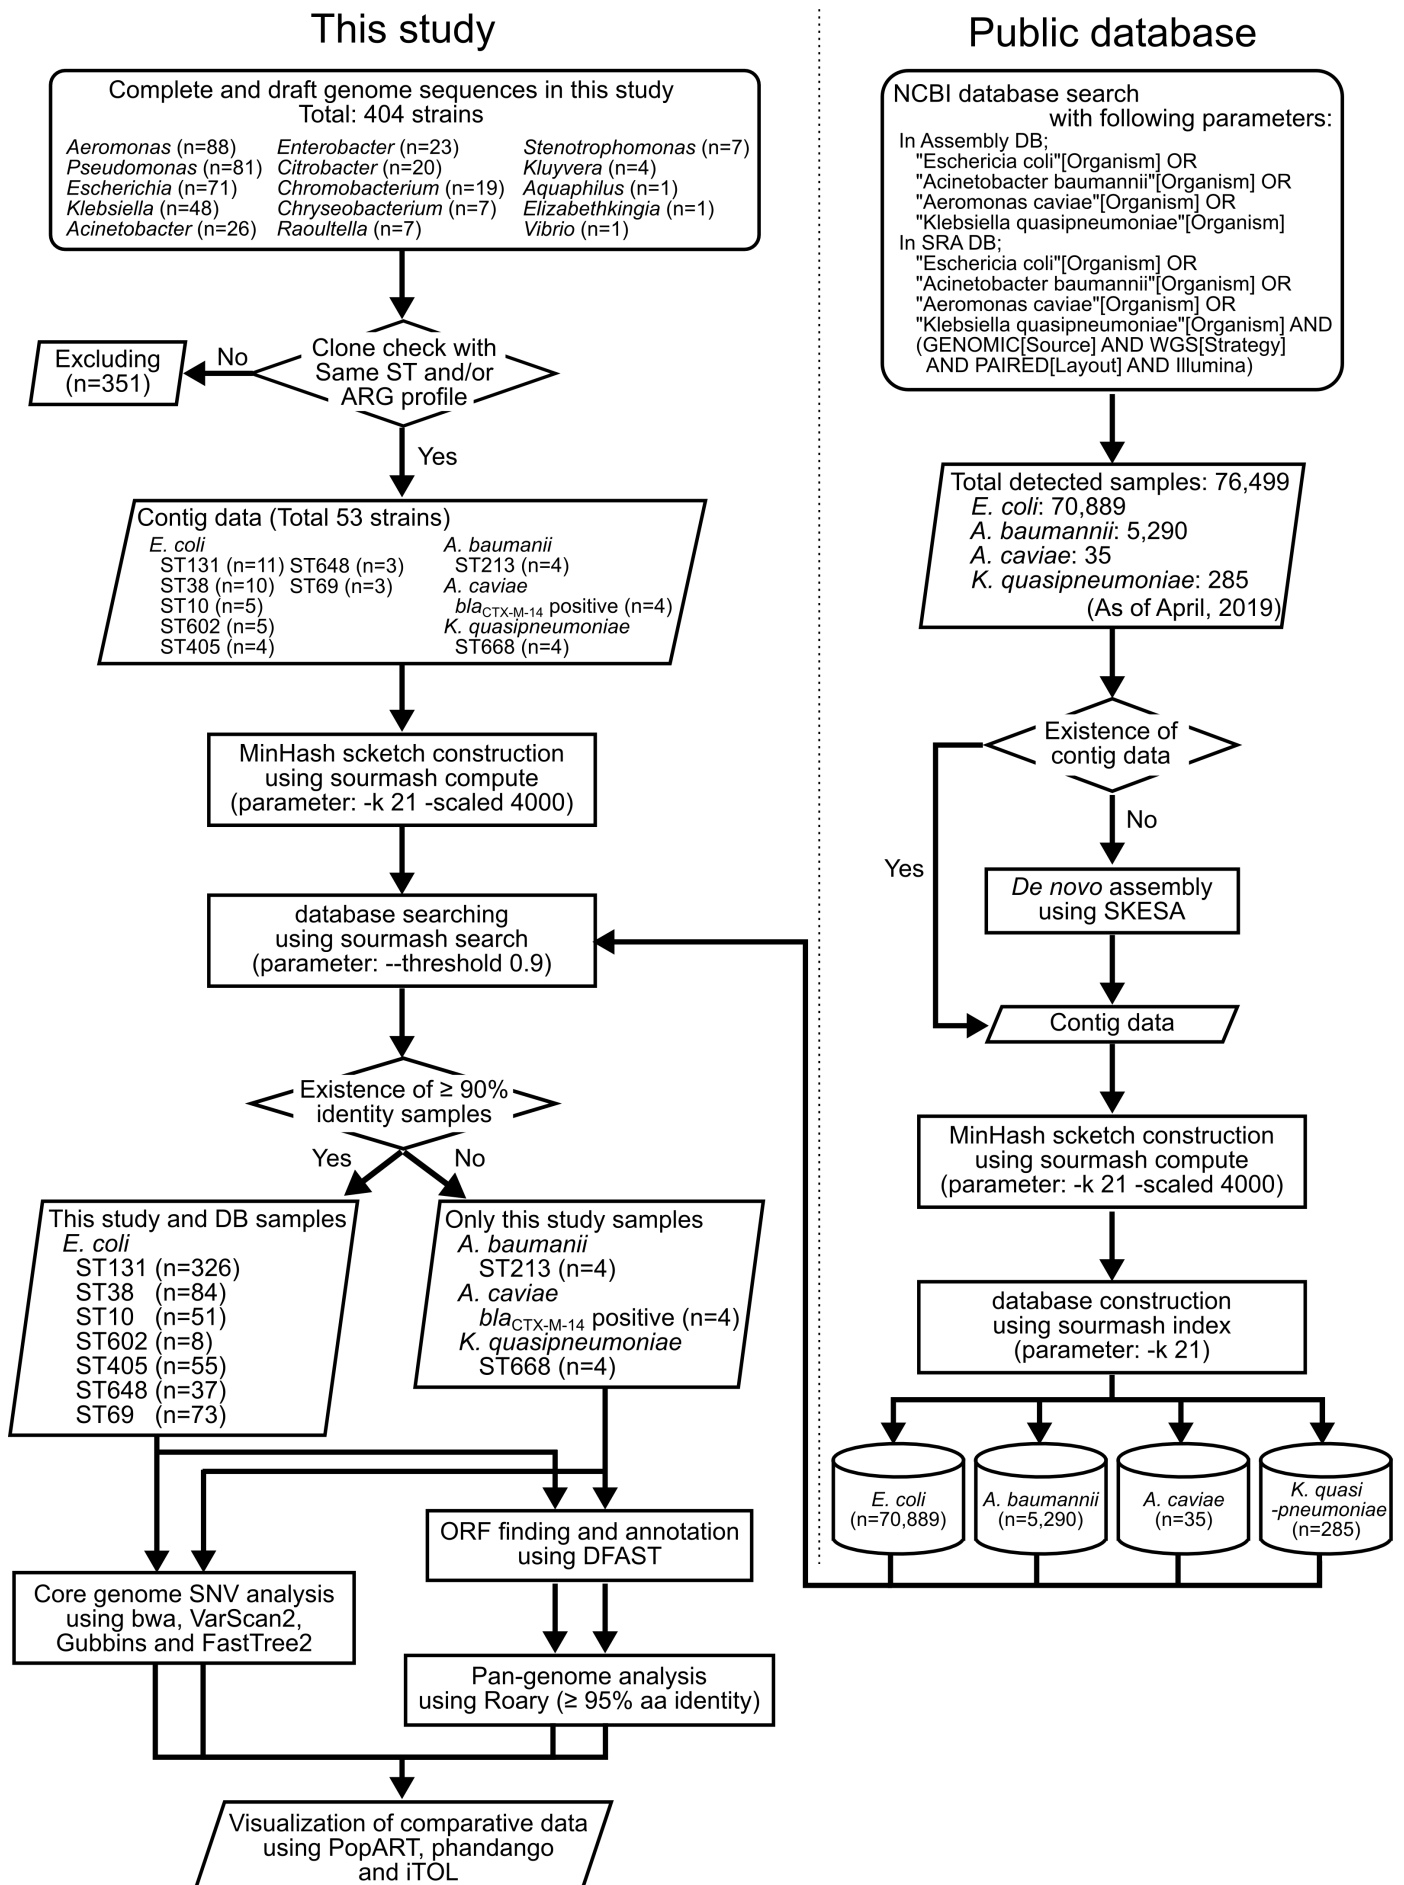

Fig. S2

Flowchart for plasmidome analysis

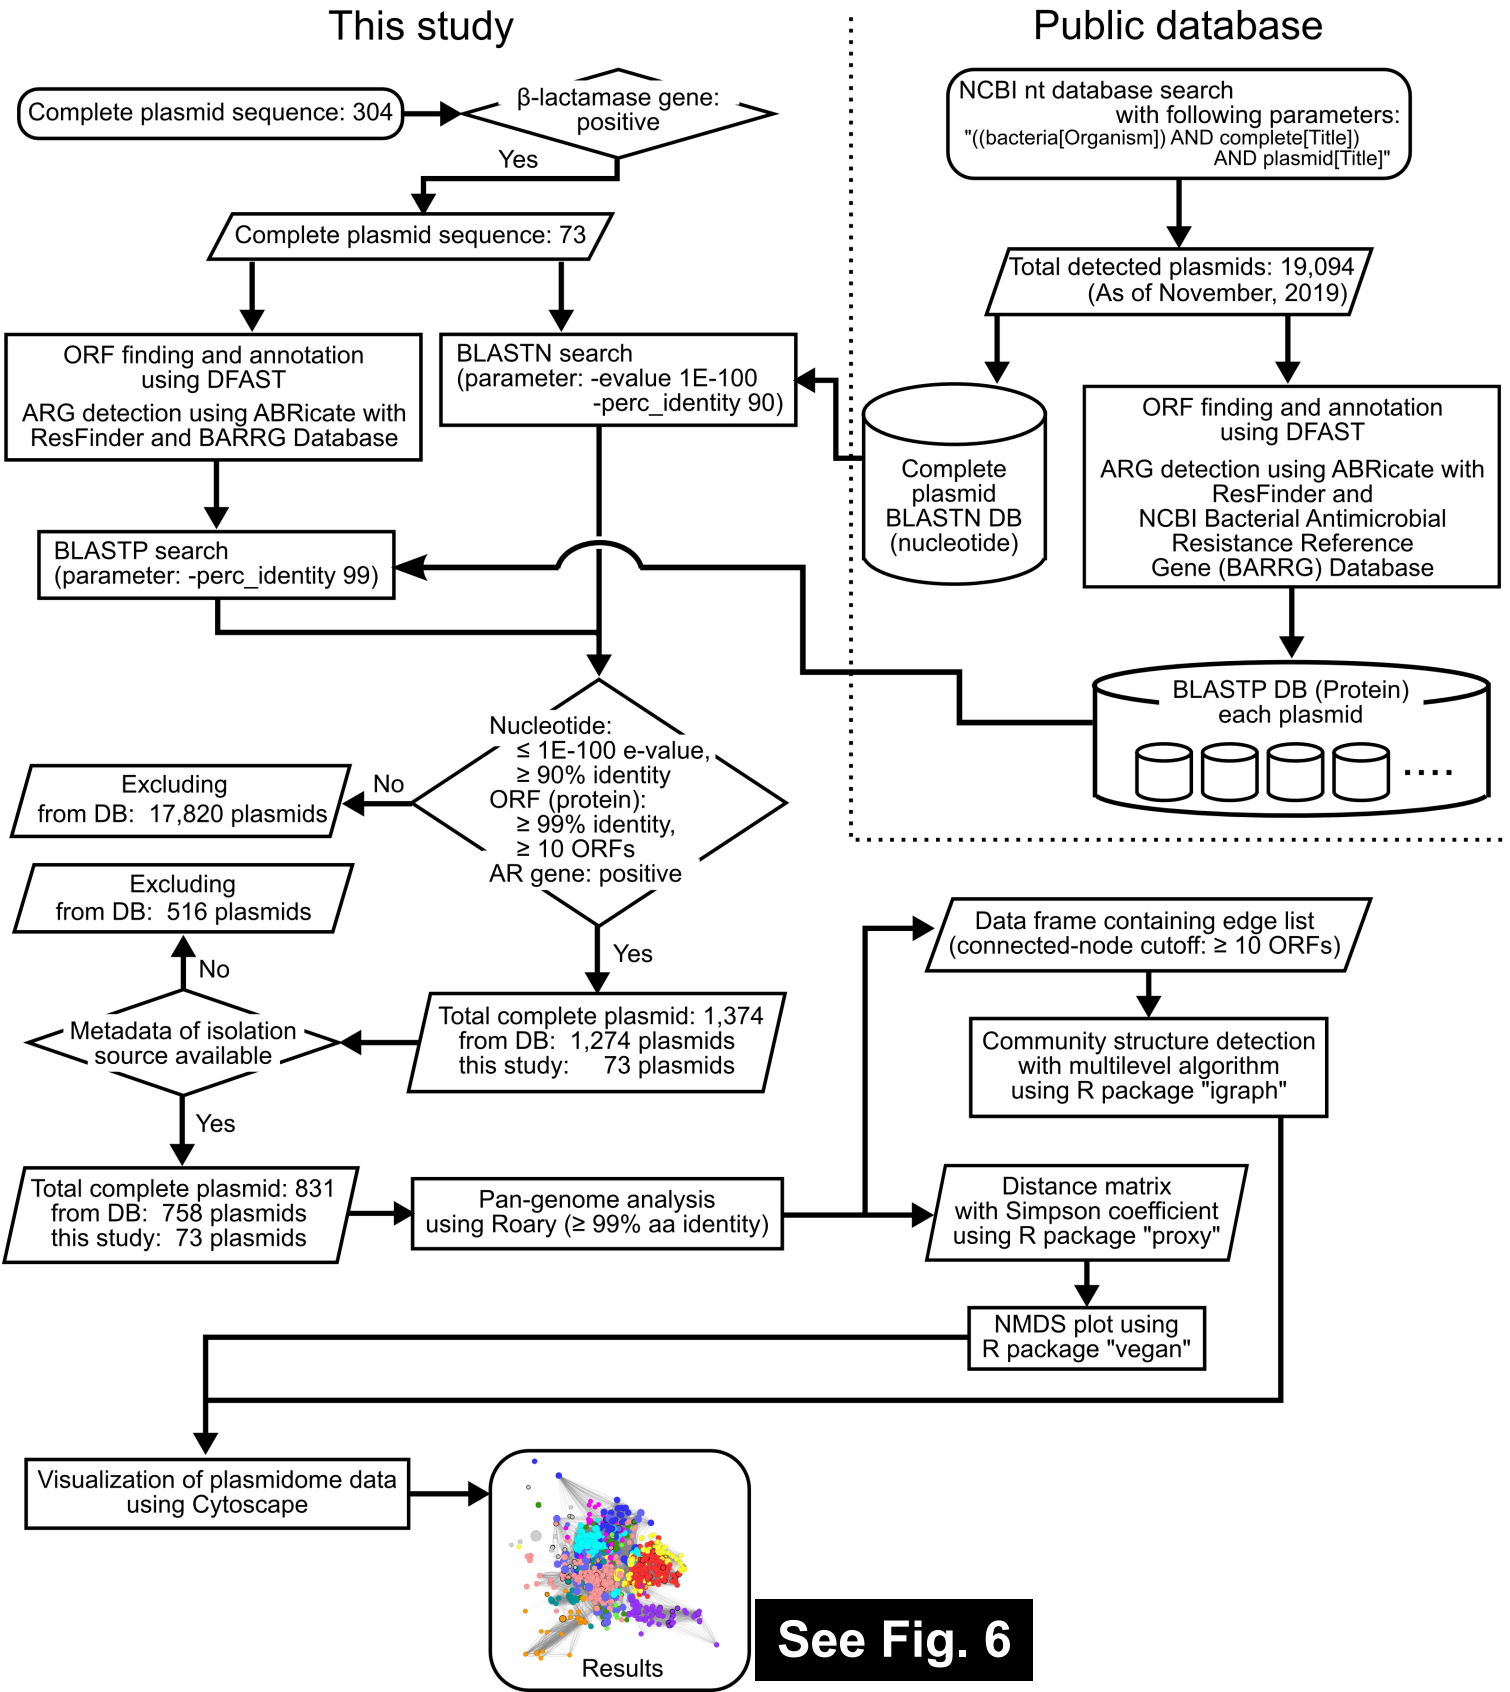

Supplement: s1 [file s1]
